# Supplementary material for: Cancer-associated fibroblast infiltration in gastric cancer: the discrepancy in subtypes pathways and immunosuppression
Source: PubMed Central journal article supplement (PMC8325313; doi:10.1186/s12967-021-03012-z), 2021-07-31

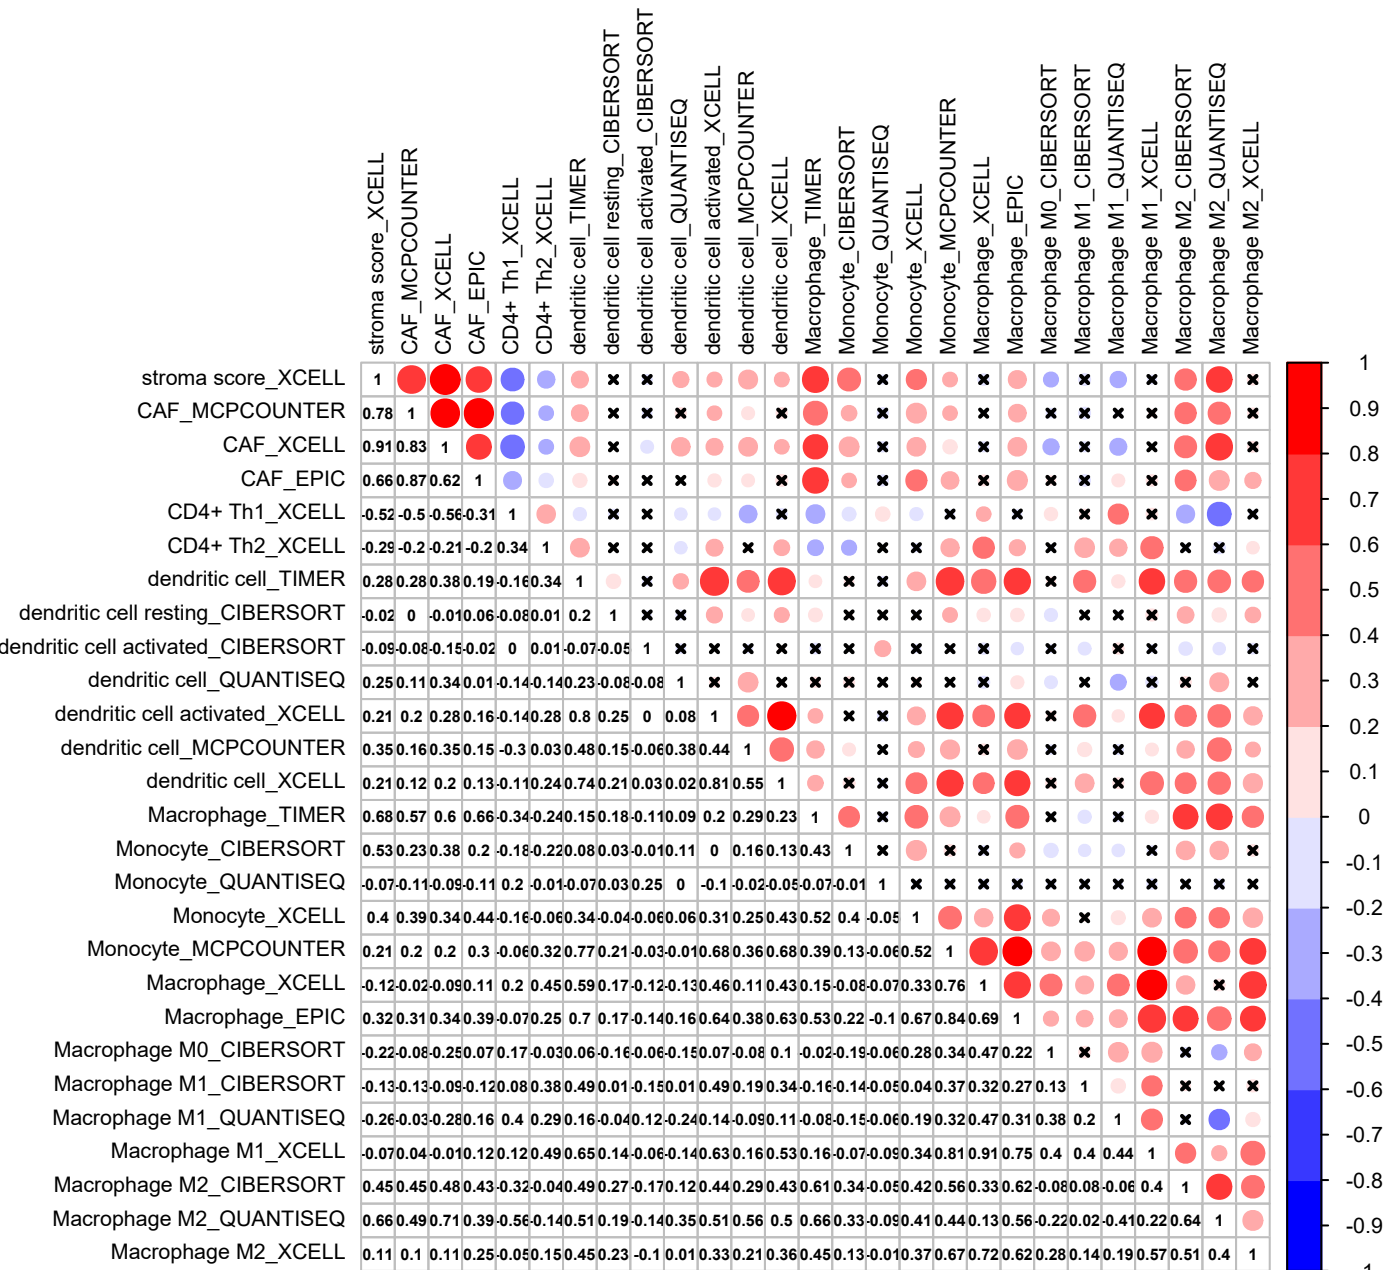

Supplement: 12967_2021_3012_MOESM8_ESM.pdf [file 12967_2021_3012_MOESM8_ESM.pdf]
